# Supplementary material for: Correlation analysis of lipid accumulation index, triglyceride-glucose index and H-type hypertension and coronary artery disease
Source: PeerJ. 2023 Sep 15;11:e16069. doi: 10.7717/peerj.16069 (PMC10506588; doi:10.7717/peerj.16069)
Supplement: Supplemental Information 1 [file peerj-11-16069-s001.xlsx]

## Sheet: non-H-type
Num	Age(years)	Gender	BMI(kg/m2)	Smoking	Sytolic blood pressure(mm Hg)	Diastolic blood pressure(mm Hg)	FPG(mmol/L)	TC(mmol/L)	HDL-C(mmol/L)	TG(mmol/L)	Hcy(mmol/L)	GLP-1(pmol/L)	SAA(mg/L)	Number of stenosed coronary vessels	Degree of stenosis	Gensini score	LAP	TyG
1	68	Male	22.62	T	162.9	91.5	7.7	4.6	1.5	1.7	6.9	24.1	7.3	Single vessel	Grade III	20	22.9	6.6
2	49	Male	19.78	T	166.4	90.2	7.5	4.6	1.6	2.1	7.2	31.3	6.9	No	Grade I	25	23.2	6.2
3	55	Male	23.04	T	172.1	84.4	7.8	4.4	1.3	1.6	6.3	33.9	8.7	No	Grade I	24	18.7	6.3
4	67	Female	25.01	T	168.5	84.3	7.1	4.9	1.3	1.8	7.1	35.7	6.5	Single vessel	Grade II	30	31.6	6.4
5	75	Female	23.71	T	164.2	101.7	7.8	3.8	1.6	1.9	7	32.2	6.5	Single vessel	Grade II	27	16.8	6.2
6	52	Female	27.69	T	171.8	94.1	6.6	4.8	1.5	1.8	8.1	41.5	11.3	Triple vessel	Grade IV	27	15	6.6
7	71	Male	24.62	T	157.6	101.8	6.5	4.9	1.2	2	7.6	35.1	8.4	Single vessel	Grade III	22	21.2	5.7
8	83	Female	27.86	T	152.8	94.5	7.2	4.5	1.1	2.1	7.7	31.9	8.9	Double branch	Grade IV	21	9.8	6.1
9	52	Female	23.18	T	163.8	93.7	8	5	1.5	2.1	8.6	38.8	6.2	Single vessel	Grade II	21	15.3	6.5
10	50	Female	16.68	T	160.3	89.6	6.5	4.6	1.4	1.6	7.9	33.2	5.2	Single vessel	Grade II	23	14.5	6.1
11	63	Male	31.87	F	162.2	96.4	7.8	4	1.4	1.8	7.5	31.4	7.7	Single vessel	Grade II	18	26.2	6.4
12	72	Male	23.5	T	162.8	93	6.8	4.4	1.5	1.6	7.9	37	10.2	No	Grade I	30	22.2	5.5
13	63	Male	25.75	F	166.6	101.5	7.2	4.3	1.7	1.7	8.8	31.4	7.6	Single vessel	Grade II	20	21.5	6.2
14	52	Male	23.8	T	169.5	106.1	7.3	5.1	1.4	1.6	9.4	26.1	8.6	Single vessel	Grade I	20	23.5	6.5
15	65	Male	21.13	T	163.7	98.5	7.4	4.7	1.5	1.7	8.9	38.6	9.1	Single vessel	Grade II	26	23.3	5.3
16	66	Female	26.78	T	168.1	92	7.9	4.3	1.5	1.8	8.2	31.1	6.2	Single vessel	Grade I	21	18	6
17	57	Male	19.36	T	164.8	89.7	7.4	5.2	1.4	1.9	7.7	49	10.7	No	Grade I	26	9.1	5.7
18	48	Female	22.89	T	162.1	90.6	6.7	4.9	1.2	2	7.9	29.7	9.5	Single vessel	Grade II	20	7.5	5.7
19	69	Male	24.7	T	161.4	97.3	7.3	4.4	1.6	2	8.4	35	7.9	Single vessel	Grade III	21	18	6.3
20	64	Female	23.18	T	174.1	98.7	6.6	4.6	1.4	1.8	9	34.4	8.7	Triple vessel	Grade IV	21	28	6.5
21	58	Male	23.08	F	162	96.2	8	4.9	1.5	2	7.9	42.6	3	Single vessel	Grade II	25	22.9	6
22	55	Male	18.65	T	174.1	94.3	7.1	4.8	1.4	2.1	8.1	12.7	10.6	Single vessel	Grade II	26	24.2	5.9
23	57	Male	27.85	T	166.6	87	7.1	4.3	1.6	1.9	7.7	45.4	12.3	Triple vessel	Grade IV	22	28.8	6.8
24	52	Male	23.89	F	165.1	100.9	7.5	4.8	1.3	2.1	8.7	42.9	6.7	Single vessel	Grade II	26	14.8	6.1
25	49	Male	19.9	T	165	90.9	7.4	4.7	1.5	1.7	7.2	28.6	10.6	Single vessel	Grade II	26	13.9	6.3
26	80	Male	21.59	F	155.4	108.5	6.9	4.5	1.7	1.6	8.2	43.2	5.4	Single vessel	Grade II	25	24.6	6
27	60	Male	25.09	T	161.5	92.6	7.5	4.3	1.4	1.9	7	34.7	9.3	Single vessel	Grade II	19	13.4	6.3
28	40	Male	24.96	T	167.8	85.8	6.7	4.9	1.4	1.5	8.1	35.3	5.2	No	Grade I	24	31.3	5.7
29	57	Male	20.26	T	156.1	97.3	7.9	4.3	1.8	1.8	7.5	39.1	13.5	Double branch	Grade IV	18	23.3	6.1
30	78	Female	21.74	F	166.9	93.6	7.6	4.9	1.4	2	8.7	37.3	5.9	Triple vessel	Grade IV	23	13.9	5.8
31	56	Female	22.05	T	169	94.8	7.3	4	1.5	1.8	9	40.7	9	No	Grade I	24	15.5	6
32	87	Female	20.61	F	159.6	95.2	6.6	4.7	1.4	1.9	7.5	40.3	7.6	Single vessel	Grade II	23	21	6.4
33	53	Male	29.11	T	162.8	89.6	7.5	5	1.5	1.9	7.5	27.8	9.3	Single vessel	Grade II	25	22.2	6.8
34	53	Female	20.61	F	166.4	95.5	7.5	4.9	1.4	2.2	8.5	31.6	6.8	Single vessel	Grade I	25	25	6
35	49	Female	18.59	F	168.3	90.5	8	4.3	1.2	1.7	9.1	32.2	7.4	Single vessel	Grade II	20	19.9	6.3
36	79	Male	23.78	T	167.4	99.5	7	4.8	1.4	1.9	6.7	50.7	8.9	Single vessel	Grade II	25	11.6	6
37	56	Male	14.32	T	164.6	83.5	7.9	4.1	1.5	1.5	8.9	31.3	10.7	Single vessel	Grade II	27	18.4	6.2
38	69	Male	27.76	T	166.7	95	7.4	5.3	1.5	1.9	7.3	34	10.3	Single vessel	Grade II	23	8.4	7.1
39	41	Male	26.73	T	152.9	90.3	6.8	4.5	1.4	1.6	6.9	42.2	9.1	No	Grade I	21	21.3	6.2
40	56	Male	19.46	T	165.2	92.1	7.5	4.7	1.6	1.8	7.6	36.9	9.5	Double branch	Grade IV	19	21.3	5.9
41	72	Female	17.85	T	161.7	89.5	7.9	5	1.4	1.7	8.4	34.9	8.9	Single vessel	Grade II	22	18.7	6.5
42	46	Female	29.13	T	152.8	96.6	8.1	3.9	1.5	2	7.6	36.1	7	Single vessel	Grade I	27	12.1	6.5
43	64	Male	18.09	T	162.4	90.5	7.7	4.1	1.4	1.9	7.5	35.1	5.9	Single vessel	Grade II	23	25.6	5.6
44	71	Male	25.16	F	163.4	95.2	6.8	4.8	1.5	1.9	7.5	37.6	12.8	Single vessel	Grade III	26	23.9	5.9
45	87	Male	22.41	T	165	102.5	7.4	4.9	1.4	1.7	7.1	41.4	6	No	Grade I	25	13.4	6
46	72	Male	23.21	F	160.5	100.8	8.1	4.3	1.7	2.1	8.2	33.2	7.5	Single vessel	Grade I	23	9.6	6
47	76	Male	26.32	T	167.4	96.2	7.3	4.7	1.8	1.7	9.3	35.2	5.5	Single vessel	Grade II	26	24	6.2
48	59	Male	28.54	F	164	99.9	7.6	4.7	1.3	1.6	8.3	40.7	8.3	Single vessel	Grade II	31	21.5	5.9
49	56	Male	20.25	T	156.7	103.7	7.4	4.9	1.6	2	8.4	30.5	9	Single vessel	Grade II	24	18	6.3
50	64	Male	24.44	F	162.7	79	7.2	4	1.3	1.9	8.9	32.6	7.1	No	Grade I	21	19.4	6.3
51	51	Female	21.84	T	166.4	99.9	8.1	4.3	1.5	1.8	9.2	38.3	6.6	Double branch	Grade IV	21	22.1	5.8
52	78	Male	24.26	T	167.4	94.1	7.5	4.7	1.7	2	7	39.4	7.1	Single vessel	Grade II	21	15.2	6.3
53	74	Male	21.92	T	154.3	103.9	6.6	4.7	1.5	1.8	8.3	28	9.2	Single vessel	Grade III	22	27.4	5.7
54	76	Male	21.7	F	168.7	90.3	6.5	4.1	1.5	2.3	8.2	35.8	7.5	Single vessel	Grade II	25	19.9	6.4
55	80	Male	22.61	T	167.1	99.8	6.6	4.5	1.7	2	8.4	37.9	5.3	Single vessel	Grade III	24	13.1	6
56	62	Male	27.13	F	160.1	94.7	7.7	4.9	1.5	1.9	6.5	31.3	11.4	Single vessel	Grade II	24	14.8	6.4
57	56	Male	22.26	T	168.9	99.4	7.1	4.4	1.7	2.2	7.3	36.5	8.3	Single vessel	Grade III	27	27	5.8
58	70	Male	23.48	T	159	94.3	7	5.2	1.4	1.8	7.6	37.1	7.2	Single vessel	Grade II	25	13.8	6.4
59	79	Male	18.35	F	157.3	89.3	7.1	4.7	1.9	1.9	7.5	35.2	10.1	Single vessel	Grade II	29	11.3	6
60	75	Male	25.34	T	160.2	94.8	7.1	4.2	1.8	2.1	8.3	27.9	8.6	Single vessel	Grade III	22	24.9	6.1
61	76	Female	20.7	F	159.2	96.8	7.4	4.4	1.5	1.7	7.2	39.7	7.4	Single vessel	Grade II	25	19.8	6
62	84	Male	21.48	T	168.8	102.7	6.8	4.7	1.4	2.2	9.4	32	11	Single vessel	Grade II	21	31.3	6.4
63	67	Male	27.97	F	152.8	90.8	7.1	4.9	1.3	1.7	9.5	37.3	7.7	Single vessel	Grade II	19	16.2	6.8
64	80	Male	28.78	T	166.9	100.9	6.9	4.2	1.5	1.9	7.8	40.3	6.7	Single vessel	Grade II	28	21.7	6.5
65	63	Female	20.42	T	162.1	90.8	7.1	4.5	1.4	2.2	8.6	41.7	6.7	Single vessel	Grade II	21	17.7	6.1
66	74	Male	25.73	F	162.5	98.4	7.9	4.6	1.4	1.5	7.7	44	5.6	Single vessel	Grade II	21	20.5	5.8
67	44	Male	23.47	T	158.6	102.7	7.1	4.5	1.5	2	8.9	39	7.9	Single vessel	Grade II	26	8	6.2
68	84	Male	21.08	T	164.2	92.7	6.5	5.5	1.8	1.6	8.5	28.1	7.8	Single vessel	Grade II	26	19.3	5.8
69	39	Female	23.67	T	159.1	91.2	7.1	3.8	1.2	1.8	7.4	42.3	10.1	Single vessel	Grade III	20	22.5	6.1
70	66	Male	26.46	T	159.3	92.7	6.9	4.6	1.7	1.7	7.9	38.4	7.2	Single vessel	Grade II	23	17.8	6.5
71	59	Male	21.44	T	163.3	97	6.4	5.2	1.6	2.1	8.2	28.4	10	Single vessel	Grade II	25	15.6	6.1
72	48	Female	25.09	F	164.5	95.3	7.8	4.1	1.8	2.1	7.7	31.7	11	Triple vessel	Grade IV	21	18	6.6
73	68	Male	22.39	T	155.7	92.2	8.4	5	1.5	2.2	7.6	31.7	10.6	Double branch	Grade IV	22	5	5.9

## Sheet: H-type
Num	Age	Gender	BMI	Smoking	Sytolic blood pressure	Diastolic blood pressure(mm Hg)	FPG(mmol/L)	TC(mmol/L)	HDL-C(mmol/L)	TG(mmol/L)	Hcy(mmol/L)	GLP-1(pmol/L)	SAA(mg/L)	Number of stenosed coronary vessels	Degree of stenosis	Gensini score	LAP	TyG
1	60	Male	23.78	T	155.8	91.4	6.4	4.2	1.7	1.9	16.8	20.6	12.3	Single vessel	Grade II	11	35.8	6.2
2	80	Male	23.38	T	159.1	97.3	7.7	5.2	1.4	1.8	17.6	14.8	17.9	Triple vessel	Grade IV	11	25.7	8.4
3	53	Male	25.46	T	164.5	101.7	6.5	4.6	1.6	1.9	16.9	19.5	11.7	Triple vessel	Grade IV	8	17.3	8.1
4	67	Male	21.33	F	166.5	91.7	7.1	4.3	1.4	2.1	17	12.7	14	Triple vessel	Grade IV	10	27.8	7.8
5	77	Female	21.76	F	170.7	102.3	7.5	5	1.8	1.7	17.4	21.7	18.7	Single vessel	Grade III	9	30.1	6.7
6	69	Male	27.29	T	160.7	98.9	6.4	4	1.5	2	16.7	27.2	11.1	Double branch	Grade IV	14	32.6	8.2
7	56	Male	17	F	151.7	97.5	7	5.1	1.6	1.9	18.8	28.5	11.9	Double branch	Grade III	4	11.3	7
8	66	Male	22.63	T	167	94.1	7.9	4.7	1.5	1.8	14.3	16.4	13.8	Double branch	Grade III	13	24.5	7.6
9	60	Male	23.4	F	152.9	90.6	7.2	4.1	1.6	2.1	17.4	21.5	9.5	Triple vessel	Grade IV	13	27.5	8.7
10	57	Male	20.65	T	167.3	97.6	6.1	4.4	1.3	2.1	17.7	22.9	18.1	Single vessel	Grade II	15	26.7	6.2
11	82	Female	22.18	F	163.8	94.4	6.4	4.8	1.8	2.1	16.4	22.2	10.4	Triple vessel	Grade IV	10	22.9	8.2
12	62	Female	23.79	T	162.2	92.9	6.9	4.7	1.4	2.1	18.6	28.6	11	Double branch	Grade IV	12	26.1	8.6
13	57	Male	18.56	T	162.6	100	7.2	4.4	1.3	1.6	15.5	23.7	16.8	Single vessel	Grade III	12	32.7	5.7
14	55	Male	30.37	T	159.6	96.9	7.2	5.2	1.5	1.7	17.4	24.8	13.2	Single vessel	Grade III	12	39.8	6.4
15	66	Male	25.87	F	156.8	98.5	6.9	4.8	1.7	1.5	18.1	27.1	14.9	Single vessel	Grade III	11	22.6	6
16	45	Male	20.71	T	155.7	87	6.8	5.2	1.6	1.9	17.1	17.9	13.1	Double branch	Grade III	15	20.7	7.6
17	43	Female	23.72	F	166.9	98.2	6.9	4.8	1.6	1.7	17	20.6	14.1	Triple vessel	Grade IV	11	33.5	8.3
18	67	Male	26.86	F	158.9	86.9	7.4	5.1	1.6	1.8	18.3	14.1	18.2	Single vessel	Grade III	8	31.2	4.9
19	48	Male	24.6	T	167.1	103.1	7.4	4	1.3	1.9	14.6	27.3	19.1	Single vessel	Grade III	10	20.8	5.8
20	59	Male	25.57	F	168.9	95.6	7.3	4	1.5	1.9	17	21.9	15.2	Triple vessel	Grade IV	7	21.4	9.5
21	74	Female	15.8	F	162.8	101.9	6.8	4.1	1.8	1.9	15.9	16	16.3	Triple vessel	Grade IV	10	27.1	8.3
22	76	Female	24.81	T	165	86.4	7	4.4	1.4	2	17.4	20	14.7	Single vessel	Grade III	10	18.1	5.9
23	84	Male	20.46	T	162.9	92.6	7.4	4.1	1.6	1.5	16.4	20.4	14.8	Single vessel	Grade III	6	21.6	6.1
24	51	Female	29.09	T	166.8	97.7	7.3	4.4	1.6	1.5	17.6	21.4	9.3	Triple vessel	Grade IV	6	32.7	8.7
25	75	Male	22.65	T	161.6	93.4	7.3	3.8	1.4	2	17.1	26.7	16.8	Single vessel	Grade III	11	25.4	5.8
26	68	Male	27.11	T	158.9	91.2	7.2	4.3	1.2	1.8	18.9	23.4	6.2	Single vessel	Grade III	11	13.6	6.4
27	80	Male	24.67	F	158	94.6	7	4.4	1.7	2	15.1	23	8.6	Triple vessel	Grade IV	14	30.4	8
28	67	Female	26.46	T	171.7	92.8	7.4	4.9	1.6	1.9	15.6	23	12.2	Triple vessel	Grade IV	2	11.7	9
29	75	Male	21.85	F	165.9	96.6	6.4	4.1	1.5	2	15.8	14.9	13.9	Single vessel	Grade II	9	15.9	5.3
30	79	Female	21.6	F	151.6	99.2	7	4.9	1.4	1.9	18.5	17.9	11.5	Single vessel	Grade III	10	25.5	6.9
31	59	Male	30.29	F	160.5	95.9	7.3	4.4	1.6	1.9	16.9	20.7	15.8	Triple vessel	Grade IV	10	23.4	7.9
32	58	Male	25.48	T	151.8	97	6.8	5.8	1.3	2.2	15.8	24.3	10.4	Triple vessel	Grade IV	9	26	7.4
33	47	Male	21.27	T	156.7	91.2	6.1	4	1.4	1.9	15.9	23.7	13.2	Triple vessel	Grade IV	10	24.9	8
34	63	Female	19.51	T	163	98	7.2	4.1	1.1	1.9	18.8	23.5	13.8	Single vessel	Grade III	9	29.6	6.4
35	69	Female	16.77	T	150.4	91.9	8	4.9	1.7	1.7	17.9	25.1	10	Double branch	Grade IV	12	12.9	8.1
36	55	Male	20.08	F	172.2	98.6	6.5	4.2	1.5	1.8	16.4	22	14.8	Single vessel	Grade II	6	30.8	5.8
37	65	Female	23.47	F	173.5	83.8	6.4	4.5	1.5	2	17.8	23.6	18.2	Single vessel	Grade III	13	28.6	6
38	60	Male	17.34	T	167.9	89	7	3.9	1.3	2	18.6	21.4	10.8	Triple vessel	Grade IV	15	19.2	7
39	59	Male	25.9	T	168.4	93	6.3	5	1.6	1.8	15.4	20.2	19.7	Triple vessel	Grade IV	7	28.6	8.7
40	74	Male	22.82	T	167.4	100.5	7.2	4.7	1.8	2.1	17.7	18.7	18.4	Single vessel	Grade III	8	24.7	5.5
41	75	Male	21.17	F	162.2	80.2	7.1	4.1	1.6	2.1	17.7	23	15.1	Double branch	Grade IV	9	34.9	7.9
42	79	Male	21.51	F	166.7	91.6	6.8	5.5	1.4	2.3	17.2	23.7	14.1	Triple vessel	Grade IV	11	27.7	7.3
43	50	Female	28.66	T	155.8	100.7	6.9	3.6	1.7	1.9	15.4	16.4	9.8	Single vessel	Grade II	10	29.2	5.5
44	62	Female	17.59	T	164.2	83.6	8	4.6	1.3	1.7	16.8	27.9	13.4	Single vessel	Grade II	8	41.5	5.9
45	73	Female	29.52	T	171	104.2	6.9	4.4	1.4	2	17.4	20	19.4	Double branch	Grade IV	9	24.5	8.1
46	48	Male	22.45	T	156.4	88.5	7.6	4.5	1.5	1.6	16.3	16.1	11	Single vessel	Grade III	5	38.2	6.3
47	89	Female	23.85	F	170.5	91.7	7.1	4.5	1.6	1.9	17	20.6	16.9	Triple vessel	Grade IV	11	38.1	8.1
48	67	Male	22.59	T	161.8	99.2	7	4.2	1.6	1.5	16.3	17.2	15.9	Single vessel	Grade II	12	25.5	6.3
49	57	Male	24.5	T	165.2	92.7	7.3	4.5	1.6	1.8	18.8	14.5	10.7	Single vessel	Grade II	8	34.7	6.8
50	77	Male	27.08	F	168.8	101.7	6.8	4.2	1.4	2	16.8	25.5	8.3	Single vessel	Grade III	14	22	5.7
51	69	Male	23.66	T	174.2	100.9	7.3	4.6	1.2	2	15.3	21.2	13.6	Triple vessel	Grade IV	12	29.7	8.5
52	66	Male	24.98	T	163.7	94.5	6.9	5.1	1.5	1.4	15.9	14.6	11.5	Triple vessel	Grade IV	7	34	8.3
53	55	Female	20.79	F	163	89.6	7.5	4.5	1.6	1.9	17.8	28.5	16.1	Single vessel	Grade III	8	28.1	5.8
54	42	Male	18.61	F	159.4	99.5	6.8	4.4	1.4	1.8	16.6	23.6	14.7	Single vessel	Grade II	13	26.8	4.7
55	52	Female	19.6	F	156.4	96	6.7	3.7	1.3	1.8	16.3	19.5	12.4	Single vessel	Grade III	12	30.6	5.7
56	56	Male	23.18	F	162.7	95	7.2	4.4	1.2	2.1	17.9	21.9	11.9	Double branch	Grade IV	5	37.3	8.2
57	70	Male	31.08	T	163.1	84.1	8.2	4.6	1.5	1.7	18.6	21.4	17	No	Grade I	11	25.8	5.7
58	72	Female	24.7	T	155.4	91.9	7.3	4.9	1.5	1.5	17.6	16.3	16.4	Single vessel	Grade III	13	18.3	5.9
59	54	Female	33.52	T	160.5	92.2	8	4.2	1.7	1.9	18.7	17	13.8	Double branch	Grade III	8	22	7.7
60	75	Male	30.75	T	162.4	87.1	6.2	3.8	1.5	1.7	18.2	19.9	15.2	Triple vessel	Grade IV	7	28	8.2
61	73	Female	32.74	T	154.3	94.5	7.7	4.3	1.3	1.8	19.4	20.7	10.8	Triple vessel	Grade IV	8	15.8	7.5
62	63	Male	25.32	F	165.3	87.2	8	4.3	1.5	1.8	18.6	20.5	15.5	Triple vessel	Grade IV	16	18.3	7.9
63	52	Male	21.03	F	155.2	103.8	7.5	4.4	1.5	2	16.1	20.8	16	Double branch	Grade III	13	35.7	6.7
64	76	Male	26.64	T	161.8	92.1	7.4	4.7	1.4	2.2	16.9	16.2	17.5	Single vessel	Grade II	8	29.8	5.9
65	63	Male	33.66	F	159.7	89.8	7	4.4	1.3	2.1	17.8	24.6	12.2	Single vessel	Grade III	12	26.9	5.6
66	51	Female	18.46	T	159.5	95.9	7	5	1.5	1.8	19.3	26.4	10.2	Triple vessel	Grade IV	12	23.5	8.5
67	67	Female	24.19	T	168.2	95.7	7.5	4.8	1.5	1.8	17.5	12.9	11.3	Triple vessel	Grade IV	13	25.8	7.5
68	71	Male	23.15	F	163	86.6	6.8	4	1.5	1.8	13.1	14.8	16.1	Single vessel	Grade III	3	27.9	5.3
69	45	Male	26.52	F	158.7	96.7	6.5	4.3	1.7	1.8	17.3	37.5	15.8	Single vessel	Grade III	6	19.4	5.7
70	88	Male	28.04	T	164.2	101.2	6.2	4	1.1	2	18.6	25.2	10.8	Triple vessel	Grade IV	7	33	7.3
71	37	Female	25.32	T	162.5	89.6	7.3	5.1	1.3	1.9	18	18.3	7.1	No	Grade I	13	28.5	5.2
72	43	Female	21.24	T	162.5	99.4	6.4	4	1.4	1.9	17.5	20.9	14.2	Triple vessel	Grade IV	11	22.9	7.6
73	80	Male	25.39	T	167.4	95.6	6.6	5.1	1.5	2.1	18.7	24	16.7	Single vessel	Grade II	10	23.4	6.8
74	68	Male	22.81	T	171.9	97.3	7.5	4.2	1.5	2	16.6	26.6	11.1	Single vessel	Grade III	7	16.2	5.5
75	59	Female	21.62	T	164.7	94.7	7.7	4.6	1.5	2	17.6	19.8	13.5	Triple vessel	Grade IV	12	24.4	8.5
76	64	Male	26.83	T	169.2	94.1	7.4	4.8	1.5	2.3	18.5	24	18	Triple vessel	Grade IV	12	30.7	7.8
77	74	Male	23.88	T	161.7	97.6	7.4	3.5	1.5	1.9	16.4	19.9	13.6	Single vessel	Grade III	15	21.3	5.9
78	53	Male	17.36	T	168.3	99.8	7.1	5	1.6	1.6	15.6	30	14.4	Single vessel	Grade III	7	19.8	5.4
79	76	Female	23.57	F	154.9	94.1	7.7	4.5	1.6	2	16.5	24.3	14	Double branch	Grade III	12	34	8.6
80	73	Female	13.79	T	165.8	93.9	6.7	4.1	1.3	1.8	16.5	25.8	13.8	Single vessel	Grade III	11	23.7	6.4
81	64	Male	23.97	T	154.1	95.5	7.3	3.7	1.6	2	17.3	21.9	13.1	Single vessel	Grade III	10	26.9	6.2
82	67	Female	29.36	T	163.6	92.3	7.6	4.1	1.9	2	16.5	30.6	12.6	Triple vessel	Grade IV	13	24.9	8.1
83	56	Male	24.88	F	165.5	110	7.2	3.8	1.5	1.7	17.5	23.8	14.5	Double branch	Grade IV	7	32.9	7.7
84	53	Male	26.88	T	167	102.1	6.3	4.8	1.4	1.7	17.9	29.9	15.1	Double branch	Grade III	7	21.5	8.1
85	59	Male	24.58	T	162.3	92.7	7.6	2.8	1.3	1.8	18.1	23.7	10.9	Triple vessel	Grade IV	13	20.1	7
86	77	Female	22.88	F	153.7	93.3	6.7	5.1	1.8	1.7	16.8	31.1	14.4	Double branch	Grade IV	9	27.6	8.5
87	61	Female	24.75	F	162.3	79	7.2	5	1.4	1.8	15.4	31.5	10.4	Triple vessel	Grade IV	12	24.9	7.5
88	58	Male	20.91	T	164.8	104.2	6.6	4.6	1.4	1.8	17.5	18.6	16.7	Single vessel	Grade III	11	31.2	5.9
89	52	Female	20.64	T	170.2	87	7.1	4.6	1.3	1.7	16.3	25	17.5	Triple vessel	Grade IV	11	24	7.6
90	50	Female	27.37	T	159.1	103.6	7.7	4.6	1.5	1.7	16.3	19.3	11.4	Single vessel	Grade II	8	19.2	5.9
91	64	Female	24.54	T	152.4	95.6	7.5	5.1	1.4	1.9	15.8	24.3	17.1	Single vessel	Grade III	13	27.7	6.5
92	78	Male	27.16	F	162.7	98.8	7	5.3	1.5	1.9	19.7	22	14.1	Triple vessel	Grade IV	12	33.9	7.2
93	80	Male	22.12	T	157.9	93.2	6.8	4.1	1.1	1.9	16.6	22.9	10.6	Single vessel	Grade III	9	32.7	6.1
94	71	Male	27.09	F	167.5	96.3	6.8	4.3	1.5	1.6	17.3	31.1	18.4	Triple vessel	Grade IV	13	30.5	8.7
95	60	Male	19.31	F	159	97.5	6.9	4.1	1.5	1.4	16.8	19.4	12.7	Double branch	Grade IV	10	25.5	7.4
96	60	Female	24.59	T	166.7	88.2	7	4.7	1.7	1.7	18.2	23.2	8.9	Double branch	Grade IV	8	22	8.7
97	69	Male	19.86	F	153.8	95.7	7	3.9	1.5	1.8	16.5	22.4	13.4	Triple vessel	Grade IV	9	32.8	8.6
98	76	Female	19.27	F	170.7	99.7	6.7	3.6	1.3	1.6	18.2	17.9	13.6	Triple vessel	Grade IV	11	25.6	7.1
99	77	Male	24.84	T	161.5	93.4	6.8	4.8	1.4	1.6	16.4	19.1	11.8	Triple vessel	Grade IV	10	44.1	8.1
100	37	Male	24.51	F	169.9	103.6	6.4	5.3	1.6	2.3	17.5	27.7	11.5	Triple vessel	Grade IV	9	29.7	7.4
101	64	Male	21.07	T	164.1	103.3	6.8	5.3	1.7	2	18.2	23.3	11.4	Single vessel	Grade III	12	31.9	5.9
102	52	Male	29.12	T	160.9	94.5	6.4	5	1.5	1.9	16.6	19.4	16.5	Single vessel	Grade III	11	15.9	5.9
103	58	Female	24.45	T	163.4	96.9	6.9	4.7	1.6	1.6	17.2	27.9	12.4	Single vessel	Grade III	14	30.4	6.5
104	86	Female	22.81	F	159.4	92.5	6.7	3.9	1.3	2.3	17.5	18.5	11.2	Triple vessel	Grade IV	11	22.3	7.9
105	54	Male	19.87	T	158.1	92.9	7.3	4.5	1.7	1.7	16.5	23	13.3	Triple vessel	Grade IV	12	19.4	8
106	43	Male	19.22	T	157	89.6	7.1	4.4	1.5	2	15.5	21.3	16.6	Single vessel	Grade III	11	24.8	6.1
107	66	Male	24.42	F	169.6	96.3	7	4.9	1.8	1.8	17.8	31.3	10.6	Triple vessel	Grade IV	7	29.6	9
108	63	Female	20.59	F	166.3	90.4	7.2	3.8	1.5	1.7	18	21	16.3	Single vessel	Grade II	11	34.5	6
109	59	Female	21.34	T	164.8	100.8	6.6	4.3	1.2	2	17.3	15.2	11.4	Triple vessel	Grade IV	10	26	8.2
110	75	Male	24.56	F	156.4	91.3	7.7	4.6	1.4	2.2	16.5	16.2	9	Single vessel	Grade II	5	31.7	6.1
111	71	Male	24.08	F	160.4	85.9	6.9	4.5	1.3	2.2	15.7	23.5	17.2	Single vessel	Grade II	10	23.7	5.8
112	69	Male	18.54	F	155.5	94.9	6.9	4.1	1.5	1.9	18.9	25.4	12.9	Triple vessel	Grade IV	13	19.2	7.6
113	61	Male	23.94	T	159.3	90.2	6.9	3.7	1.5	2	19.8	30.4	15.4	Single vessel	Grade III	9	27.6	5.5
